# Supplementary material for: Surprising complexity of the ancestral apoptosis network
Source: PubMed Central journal article supplement (PMC2246300; doi:10.1186/gb-2007-8-10-r226), 2007-10-24
Supplement: gb-2007-8-10-r226-S2.pdf [file gb-2007-8-10-r226-S2.pdf]

## Additional Table 2

### Protein sequences for Figure 2 (phylogeny and domain organization of CED-

#### 4/Apaf-1 homologs)

| Abbreviation | Source and identifier                                                     |
|--------------|---------------------------------------------------------------------------|
| Apaf-1_HUMAN | SWISS-PROT: O14727 APAF_HUMAN                                             |
| 1_BRAFL      | JGI Branchiostoma floridae v1.0: estExt_gwp.C_240387                      |
| 2_BRAFL      | JGI Branchiostoma floridae v1.0: fgenesh2_pg.scaffold_19000170            |
| 3_BRAFL      | JGI Branchiostoma floridae v1.0: fgenesh2_pg.scaffold_208000046           |
| 4_BRAFL*     | JGI Branchiostoma floridae v1.0: fgenesh2_pg.scaffold_265000042           |
| 5_BRAFL*     | JGI Branchiostoma floridae v1.0: fgenesh2_pg.scaffold_355000025           |
| 6_BRAFL*     | JGI Branchiostoma floridae v1.0: fgenesh2_pg.scaffold_460000003           |
| 7_BRAFL*     | JGI Branchiostoma floridae v1.0: fgenesh2_pg.scaffold_460000017           |
| 8_BRAFL      | JGI Branchiostoma floridae v1.0: fgenesh2_pg.scaffold_589000008           |
| 9_BRAFL      | JGI Branchiostoma floridae v1.0: fgenesh2_pg.scaffold_879000002           |
| CED4_CAEEL   | Ensembl release_38 pep.abinitio: SNAP00000041623 U21324.3                 |
| 11_CHICK     | Ensembl release_38 pep.abinitio: GENSCAN00000076013 Contig36.91           |
| 12_CANFA     | Ensembl release_38 pep.abinitio: GENSCAN00000000438 contig_25065.1.242843 |
| Dark_DROME   | Ensembl release_38 pep.abinitio: GENSCAN00000003874 2R_251                |
| 14_FUGRU     | JGI Fugu rubripes v4.0:fgh5_pm.C_scaffold_8000017_fugu                    |
| 15_TETNG     | Ensembl release_38 pep.abinitio: GIDT00016877001 SCAF14664                |
| 16_XENTR     | Ensembl release_38 pep.abinitio: GENSCAN00000069556 scaffold_243          |
| 17_BRARE     | Ensembl release_38 pep.abinitio: GENSCAN00000025232 Zv5_NA12050.1         |
| 18_NEMVE     | JGI Nematostella vectensis v1.0: scaffold_12 genscan_142                  |
| 19_NEMVE     | JGI Nematostella vectensis v1.0: scaffold_2 genscan_139                   |
| 20_NEMVE     | JGI Nematostella vectensis v1.0: scaffold_218 genscan_24                  |
| 21_NEMVE     | JGI Nematostella vectensis v1.0: scaffold_453 genscan_8                   |
| Apaf-1_MOUSE | SWISS-PROT: O88879 APAF_MOUSE                                             |
| 23_STRPU     | HGSC Spur_v2.0: Scaffold_v2_43260 genscan_2                               |
| 24_STRPU*    | HGSC Spur_v2.0: Scaffold_v2_46046 genscan_43                              |
| 25_STRPU     | HGSC Spur_v2.0: Scaffold_v2_48152 genscan_19                              |
| 26_STRPU     | HGSC Spur_v2.0: Scaffold_v2_71267 genscan_19                              |
| 27_STRPU*    | HGSC Spur_v2.0: Scaffold_v2_74154 genscan_16                              |
| 28_DROPS     | NCBI: GI:54636004                                                         |
| 29_AEDAE     | NCBI: GI:108883840                                                        |
| 30_TRICA     | NCBI: GI:91076790                                                         |
| 31_CAEBR     | NCBI: GI:62286523                                                         |
| 32_BRAFL*    | JGI Branchiostoma floridae v1.0: fgenesh2_pg.scaffold_248000001           |
| 33_BRAFL     | JGI Branchiostoma floridae v1.0: estExt_fgenesh2_pg.C_1570063             |
| 34_BRAFL     | JGI Branchiostoma floridae v1.0: fgenesh2_pg.scaffold_941000003           |
| 35_BRAFL     | JGI Branchiostoma floridae v1.0: fgenesh2_pg.scaffold_580000077           |
| 36_BRAFL     | JGI Branchiostoma floridae v1.0: estExt_fgenesh2_pg.C_220128              |
| 37_BRAFL     | JGI Branchiostoma floridae v1.0: estExt_fgenesh2_pg.C_2730005             |
| 38_BRAFL*    | JGI Branchiostoma floridae v1.0: estExt_fgenesh2_pg.C_2730019             |

\*These 8 sequences are not shown in Figure 2 because they appear redundant and/or are the result of questionable assemblies.
