# Supplementary material for: Surprising complexity of the ancestral apoptosis network
Source: PubMed Central journal article supplement (PMC2246300; doi:10.1186/gb-2007-8-10-r226), 2007-10-24
Supplement: gb-2007-8-10-r226-S4.pdf [file gb-2007-8-10-r226-S4.pdf]

## Additional Table 4

### Protein sequences for Additional Figure 4 (phylogeny of the caspase family)

| Abbreviation  | Source and identifier                                           |
|---------------|-----------------------------------------------------------------|
| CASP1_HUMAN   | SWISS-PROT: P29466 CASP1_HUMAN                                  |
| CASP2_HUMAN   | SWISS-PROT: P42575 CASP2_HUMAN                                  |
| CASP3_HUMAN   | SWISS-PROT: P42574 CASP3_HUMAN                                  |
| CASP4_HUMAN   | SWISS-PROT: P49662 CASP4_HUMAN                                  |
| CASP5_HUMAN   | SWISS-PROT: P51878 CASP5_HUMAN                                  |
| CASP6_HUMAN   | SWISS-PROT: P55212 CASP6_HUMAN                                  |
| CASP7_HUMAN   | SWISS-PROT: P55210 CASP7_HUMAN                                  |
| CASP8_HUMAN   | SWISS-PROT: Q14790 CASP8_HUMAN                                  |
| CASP9_HUMAN   | SWISS-PROT: P55211 CASP9_HUMAN                                  |
| CASP10_HUMAN  | SWISS-PROT: Q92851 CASPA_HUMAN                                  |
| CASP14_HUMAN  | SWISS-PROT: P31944 CASPE_HUMAN                                  |
| MALT1_HUMAN p | SWISS-PROT: Q9UDY8 MALT1_HUMAN                                  |
| CFLAR_HUMAN   | SWISS-PROT: O15519 CFLAR_HUMAN                                  |
| CASP12_HUMAN  | SWISS-PROT: Q6UXS9 Q6UXS9_HUMAN                                 |
| 14_BRAFL      | JGI Branchiostoma floridae v1.0: e_gw.281.109.1                 |
| 15_BRAFL      | JGI Branchiostoma floridae v1.0: e_gw.289.46.1                  |
| 16_BRAFL      | JGI Branchiostoma floridae v1.0: e_gw.317.50.1                  |
| 17_BRAFL      | JGI Branchiostoma floridae v1.0: e_gw.323.60.1                  |
| 18_BRAFL      | JGI Branchiostoma floridae v1.0: e_gw.38.32.1                   |
| 19_BRAFL      | JGI Branchiostoma floridae v1.0: e_gw.41.74.1                   |
| 20_BRAFL      | JGI Branchiostoma floridae v1.0: e_gw.440.22.1                  |
| 21_BRAFL      | JGI Branchiostoma floridae v1.0: e_gw.457.27.1                  |
| 22_BRAFL      | JGI Branchiostoma floridae v1.0: e_gw.558.40.1                  |
| 23_BRAFL      | JGI Branchiostoma floridae v1.0: e_gw.58.117.1                  |
| 24_BRAFL      | JGI Branchiostoma floridae v1.0: e_gw.58.143.1                  |
| 25_BRAFL      | JGI Branchiostoma floridae v1.0: e_gw.624.12.1                  |
| 26_BRAFL      | JGI Branchiostoma floridae v1.0: e_gw.752.1.1                   |
| 27_BRAFL      | JGI Branchiostoma floridae v1.0: e_gw.79.62.1                   |
| 28_BRAFL      | JGI Branchiostoma floridae v1.0: e_gw.87.121.1                  |
| 29_BRAFL      | JGI Branchiostoma floridae v1.0: estExt_fgenesh2_pg.C_1570004   |
| 30_BRAFL      | JGI Branchiostoma floridae v1.0: estExt_fgenesh2_pg.C_570070    |
| 31_BRAFL      | JGI Branchiostoma floridae v1.0: estExt_gwp.C_380044            |
| 32_BRAFL      | JGI Branchiostoma floridae v1.0: estExt_gwp.C_5310019           |
| 33_BRAFL      | JGI Branchiostoma floridae v1.0: fgenesh2_kg.scaffold_76000001  |
| 34_BRAFL      | JGI Branchiostoma floridae v1.0: fgenesh2_pg.scaffold_106000101 |
| 35_BRAFL      | JGI Branchiostoma floridae v1.0: fgenesh2_pg.scaffold_11000166  |
| 36_BRAFL      | JGI Branchiostoma floridae v1.0: fgenesh2_pg.scaffold_114000007 |
| 37_BRAFL      | JGI Branchiostoma floridae v1.0: fgenesh2_pg.scaffold_116000092 |
| 38_BRAFL      | JGI Branchiostoma floridae v1.0: fgenesh2_pg.scaffold_12000073  |
| 39_BRAFL      | JGI Branchiostoma floridae v1.0: fgenesh2_pg.scaffold_128000077 |
| 40_BRAFL      | JGI Branchiostoma floridae v1.0: fgenesh2_pg.scaffold_14000081  |
| 41_BRAFL      | JGI Branchiostoma floridae v1.0: fgenesh2_pg.scaffold_14000189  |
| 42_BRAFL      | JGI Branchiostoma floridae v1.0: fgenesh2_pg.scaffold_163000014 |
| 43_BRAFL      | JGI Branchiostoma floridae v1.0: fgenesh2_pg.scaffold_17000032  |
| 44_BRAFL      | JGI Branchiostoma floridae v1.0: fgenesh2_pg.scaffold_179000014 |
| 45_BRAFL      | JGI Branchiostoma floridae v1.0: fgenesh2_pg.scaffold_189000062 |
| 46_BRAFL      | JGI Branchiostoma floridae v1.0: fgenesh2_pg.scaffold_206000012 |
| 47_BRAFL      | JGI Branchiostoma floridae v1.0: fgenesh2_pg.scaffold_224000042 |
| 48_BRAFL      | JGI Branchiostoma floridae v1.0: fgenesh2_pg.scaffold_257000041 |
| 49_BRAFL      | JGI Branchiostoma floridae v1.0: fgenesh2_pg.scaffold_266000032 |
| 50_BRAFL      | JGI Branchiostoma floridae v1.0: fgenesh2_pg.scaffold_440000013 |
| 51_BRAFL      | JGI Branchiostoma floridae v1.0: fgenesh2_pg.scaffold_44000123  |
| 52_BRAFL      | JGI Branchiostoma floridae v1.0: fgenesh2_pg.scaffold_505000011 |
| 53_BRAFL      | JGI Branchiostoma floridae v1.0: fgenesh2_pg.scaffold_505000014 |
| 54_BRAFL      | JGI Branchiostoma floridae v1.0: fgenesh2_pg.scaffold_55000086  |
| 55_BRAFL      | JGI Branchiostoma floridae v1.0: fgenesh2_pg.scaffold_58000144  |
| 56_BRAFL      | JGI Branchiostoma floridae v1.0: fgenesh2_pg.scaffold_85000001  |
| 57_BRAFL      | JGI Branchiostoma floridae v1.0: fgenesh2_pg.scaffold_96000010  |
| 58_BRAFL      | JGI Branchiostoma floridae v1.0: gw.24.194.1 scaffold_24        |
| 59_BRAFL      | JGI Branchiostoma floridae v1.0: gw.3.308.1 scaffold_3          |
| 60_BRAFL      | JGI Branchiostoma floridae v1.0: gw.41.75.1 scaffold_41         |
| 61_BRAFL      | JGI Branchiostoma floridae v1.0: gw.457.36.1 scaffold_457       |
| 62_BRAFL      | JGI Branchiostoma floridae v1.0: gw.5.697.1 scaffold_5          |
| 63_BRAFL      | JGI Branchiostoma floridae v1.0: gw.527.30.1 scaffold_527       |
| 64_BRAFL      | JGI Branchiostoma floridae v1.0: gw.531.4.1 scaffold_531        |

|              |                                                                           |
|--------------|---------------------------------------------------------------------------|
| 65_BRAFL*    | JGI Branchiostoma floridae v1.0: gw.752.6.1 scaffold_752                  |
| 66_BRAFL     | JGI Branchiostoma floridae v1.0: gw.97.227.1 scaffold_97                  |
| 67_CAEEL p   | Ensembl release_38 pep.abinitio: SNAP00000012440 U28993.2                 |
| CED3_CAEEL   | Ensembl release_38 pep.abinitio: SNAP00000017192 Z81049.1                 |
| CSP3_CAEEL   | Ensembl release_38 pep.abinitio: SNAP00000020500 AL032657.1               |
| CSP2_CAEEL   | Ensembl release_38 pep.abinitio: SNAP00000037670 AC084197.1               |
| CSP1_CAEEL   | Ensembl release_38 pep.abinitio: SNAP00000039230 Z93393.2                 |
| 72_CHICK     | Ensembl release_38 pep.abinitio: GENSCAN00000017364 Contig150.9           |
| 73_CHICK     | Ensembl release_38 pep.abinitio: GENSCAN00000028400 Contig19.506          |
| 74_CHICK     | Ensembl release_38 pep.abinitio: GENSCAN000000031849 Contig22.130         |
| 75_CHICK     | Ensembl release_38 pep.abinitio: GENSCAN00000037777 Contig3.1036          |
| 76_CHICK     | Ensembl release_38 pep.abinitio: GENSCAN00000038708 Contig75.50           |
| 77_CHICK     | Ensembl release_38 pep.abinitio: GENSCAN00000038723 Contig75.50           |
| 78_CHICK     | Ensembl release_38 pep.abinitio: GENSCAN00000038726 Contig75.50           |
| 79_CHICK     | Ensembl release_38 pep.abinitio: GENSCAN00000038728 Contig75.50           |
| 80_CHICK p   | Ensembl release_38 pep.abinitio: GENSCAN00000043145 Contig106.83          |
| 81_CHICK     | Ensembl release_38 pep.abinitio: GENSCAN00000062140 Contig3.422           |
| 82_CHICK*    | Ensembl release_38 pep.abinitio: GENSCAN00000064390 Contig184.95          |
| 83_CHICK*    | Ensembl release_38 pep.abinitio: GENSCAN00000070643 Contig184.94          |
| 84_CHICK     | Ensembl release_38 pep.abinitio: GENSCAN00000071772 Contig1601.9          |
| 85_CIOIN     | Ensembl release_38 pep.abinitio: FGENESH00000070934 12q_24                |
| 86_CIOIN     | Ensembl release_38 pep.abinitio: GENFINDER00000089975 12q_245             |
| 87_CIOIN     | Ensembl release_38 pep.abinitio: GENSCAN00000077382 12p_145               |
| 88_CIOIN     | Ensembl release_38 pep.abinitio: GENSCAN00000078600 8q_205                |
| 89_CIOIN     | Ensembl release_38 pep.abinitio: GENSCAN00000080393 12q_223               |
| 90_CIOIN     | Ensembl release_38 pep.abinitio: GENSCAN00000080400 12q_219               |
| 91_CIOIN     | Ensembl release_38 pep.abinitio: GENSCAN00000088212 scaffold_180_7        |
| 92_CIOIN     | Ensembl release_38 pep.abinitio: GENSCAN00000091551 8q_418                |
| 93_CIOIN*    | Ensembl release_38 pep.abinitio: GENSCAN00000091653 6q_75                 |
| 94_CIOIN     | Ensembl release_38 pep.abinitio: GENSCAN00000102076 4q_272                |
| 95_CIOIN     | Ensembl release_38 pep.abinitio: SNAP_CIONA00000044087 12q_220            |
| 110_CANFA    | Ensembl release_38 pep.abinitio: GENSCAN00000003002 contig_48336.1.38164  |
| 111_CANFA p  | Ensembl release_38 pep.abinitio: GENSCAN00000020890 contig_14601.1.99562  |
| 112_CANFA    | Ensembl release_38 pep.abinitio: GENSCAN00000022553 contig_16054.1.355264 |
| 113_CANFA    | Ensembl release_38 pep.abinitio: GENSCAN00000027274 contig_38046.1.61723  |
| 114_CANFA    | Ensembl release_38 pep.abinitio: GENSCAN00000030806 contig_44577.1.10789  |
| 115_CANFA    | Ensembl release_38 pep.abinitio: GENSCAN00000044240 contig_45483.1.101664 |
| 116_CANFA    | Ensembl release_38 pep.abinitio: GENSCAN00000044314 contig_23073.1.2928   |
| 117_CANFA    | Ensembl release_38 pep.abinitio: GENSCAN00000049145 contig_54810.1.318000 |
| 118_CANFA    | Ensembl release_38 pep.abinitio: GENSCAN00000049146 contig_54810.1.318000 |
| 119_CANFA    | Ensembl release_38 pep.abinitio: GENSCAN00000049148 contig_54810.1.318000 |
| 120_CANFA    | Ensembl release_38 pep.abinitio: GENSCAN00000071074 contig_21074.1.14608  |
| 121_CANFA    | Ensembl release_38 pep.abinitio: GENSCAN00000075637 contig_55271.1.46482  |
| 122_CANFA    | Ensembl release_38 pep.abinitio: GENSCAN00000077085 contig_9193.1.230116  |
| 123_CANFA    | Ensembl release_38 pep.abinitio: GENSCAN00000077086 contig_9193.1.230116  |
| DAMM_DROME   | Ensembl release_38 pep.abinitio: GENSCAN00000016500 2R_148                |
| Strica_DROME | Ensembl release_38 pep.abinitio: GENSCAN00000005714 2R_31                 |
| Dcp1_DROME   | Ensembl release_38 pep.abinitio: GENSCAN00000010154 2R_382                |
| Dronc_DROME  | Ensembl release_38 pep.abinitio: GENSCAN00000003674 3L_199                |
| Decay_DROME  | Ensembl release_38 pep.abinitio: GENSCAN00000003643 3R_247                |
| drICE_DROME  | Ensembl release_38 pep.abinitio: GENSCAN00000014490 3R_513                |
| DREDD_DROME  | Ensembl release_38 pep.abinitio: GENSCAN00000016383 X_10                  |
| 131_FUGRU    | Ensembl release_38 pep.abinitio: GENSCANSLICE00000008704 scaffold_466     |
| 132_FUGRU*   | Ensembl release_38 pep.abinitio: GENSCANSLICE00000010825 scaffold_46      |
| 133_FUGRU    | Ensembl release_38 pep.abinitio: GENSCANSLICE00000011518 scaffold_4498    |
| 134_FUGRU    | Ensembl release_38 pep.abinitio: GENSCANSLICE00000012037 scaffold_17      |
| 135_FUGRU    | Ensembl release_38 pep.abinitio: GENSCANSLICE00000015664 scaffold_100     |
| 136_FUGRU p  | Ensembl release_38 pep.abinitio: GENSCANSLICE00000017185 scaffold_4       |
| 137_FUGRU p  | Ensembl release_38 pep.abinitio: GENSCANSLICE00000019238 scaffold_135     |
| 138_FUGRU    | Ensembl release_38 pep.abinitio: GENSCANSLICE00000020903 scaffold_263     |
| 139_FUGRU p  | Ensembl release_38 pep.abinitio: GENSCANSLICE00000021754 scaffold_217     |
| 140_FUGRU    | Ensembl release_38 pep.abinitio: GENSCANSLICE00000026027 scaffold_387     |
| 141_FUGRU    | Ensembl release_38 pep.abinitio: GENSCANSLICE00000028088 scaffold_9       |
| 142_FUGRU    | Ensembl release_38 pep.abinitio: GENSCANSLICE00000028892 scaffold_81      |
| 143_FUGRU    | Ensembl release_38 pep.abinitio: GENSCANSLICE00000029213 scaffold_17      |
| 144_MOUSE    | Ensembl release_38 pep.abinitio: GENSCAN00000154690 AC112968.11           |
| 145_MOUSE    | Ensembl release_38 pep.abinitio: GENSCAN00000156226 AC115771.13           |
| 146_MOUSE    | Ensembl release_38 pep.abinitio: GENSCAN00000169177 AL928577.21           |
| 147_MOUSE    | Ensembl release_38 pep.abinitio: GENSCAN00000170756 AC119267.8            |
| 148_MOUSE*   | Ensembl release_38 pep.abinitio: GENSCAN00000181320 CAAA01088007.1        |
| 149_MOUSE    | Ensembl release_38 pep.abinitio: GENSCAN00000191566 AC141637.3            |
| 150_MOUSE    | Ensembl release_38 pep.abinitio: GENSCAN00000196011 AC159747.8            |
| 151_MOUSE    | Ensembl release_38 pep.abinitio: GENSCAN00000211658 AC118620.10           |

152\_MOUSE p Ensembl release\_38 pep.abinitio: GENSCAN00000218568 AC102240.12  
153\_TETNG Ensembl release\_38 pep.abinitio: GIDT00013441001 SCAF14542  
154\_TETNG\* Ensembl release\_38 pep.abinitio: GIDT00022814001 SCAF15004  
155\_TETNG Ensembl release\_38 pep.abinitio: GSCT00000593001 SCAF14542  
156\_TETNG Ensembl release\_38 pep.abinitio: GSCT00000759001 SCAF14543  
157\_TETNG Ensembl release\_38 pep.abinitio: GSCT00002741001 SCAF14659  
158\_TETNG p Ensembl release\_38 pep.abinitio: GSCT00005619001 SCAF14995  
159\_TETNG p Ensembl release\_38 pep.abinitio: GSCT00005723001 SCAF14996  
160\_TETNG\* Ensembl release\_38 pep.abinitio: GSCT00006606001 SCAF15004  
161\_TETNG Ensembl release\_38 pep.abinitio: GSCT00007603001 SCAF15038  
162\_TETNG p Ensembl release\_38 pep.abinitio: GSCT00008343001 SCAF15122  
163\_TETNG Ensembl release\_38 pep.abinitio: GSCT00009329001 SCAF15010  
164\_TETNG\* Ensembl release\_38 pep.abinitio: GSCT00011521001 SCAF14157  
165\_TETNG Ensembl release\_38 pep.abinitio: GWSST00003280001 SCAF14485  
166\_TETNG Ensembl release\_38 pep.abinitio: GWSST00015337001 SCAF15106  
167\_XENTR Ensembl release\_38 pep.abinitio: FGENESH00000087096 scaffold\_90  
168\_XENTR p Ensembl release\_38 pep.abinitio: GENSCAN00000011636 scaffold\_103  
169\_XENTR Ensembl release\_38 pep.abinitio: GENSCAN00000013067 scaffold\_89  
170\_XENTR Ensembl release\_38 pep.abinitio: GENSCAN00000034007 scaffold\_736  
171\_XENTR p Ensembl release\_38 pep.abinitio: GENSCAN00000037477 scaffold\_228  
172\_XENTR Ensembl release\_38 pep.abinitio: GENSCAN00000038004 scaffold\_90  
173\_XENTR Ensembl release\_38 pep.abinitio: GENSCAN00000039972 scaffold\_135  
174\_XENTR Ensembl release\_38 pep.abinitio: GENSCAN00000055657 scaffold\_218  
175\_XENTR Ensembl release\_38 pep.abinitio: GENSCAN00000055664 scaffold\_218  
176\_XENTR Ensembl release\_38 pep.abinitio: GENSCAN00000055667 scaffold\_218  
177\_XENTR Ensembl release\_38 pep.abinitio: GENSCAN00000066282 scaffold\_1113  
178\_XENTR Ensembl release\_38 pep.abinitio: GENSCAN00000068240 scaffold\_30  
179\_XENTR Ensembl release\_38 pep.abinitio: GENSCAN00000074022 scaffold\_1474  
180\_BRARE\* Ensembl release\_38 pep.abinitio: FGENESH00000074106 Zv5\_NA4522.1  
181\_BRARE Ensembl release\_38 pep.abinitio: GENSCAN00000002628 Zv5\_scaffold449.1  
182\_BRARE Ensembl release\_38 pep.abinitio: GENSCAN00000004209 Zv5\_scaffold1510.1  
183\_BRARE Ensembl release\_38 pep.abinitio: GENSCAN00000004413 BX005348.9.1-145299  
184\_BRARE Ensembl release\_38 pep.abinitio: GENSCAN00000004425 BX323548.11.1-229237  
185\_BRARE Ensembl release\_38 pep.abinitio: GENSCAN00000010360 BX649388.7.1-177865  
186\_BRARE Ensembl release\_38 pep.abinitio: GENSCAN00000010681 BX537280.12.1-163151  
187\_BRARE p Ensembl release\_38 pep.abinitio: GENSCAN00000013724 AL935332.12.2001-  
188\_BRARE Ensembl release\_38 pep.abinitio: GENSCAN00000020009 Zv5\_scaffold816.8  
189\_BRARE Ensembl release\_38 pep.abinitio: GENSCAN00000024545 Zv5\_NA4522.1  
190\_BRARE Ensembl release\_38 pep.abinitio: GENSCAN00000024624 Zv5\_scaffold1161.3  
191\_BRARE Ensembl release\_38 pep.abinitio: GENSCAN00000027488 Zv5\_scaffold66.3  
192\_BRARE Ensembl release\_38 pep.abinitio: GENSCAN00000028136 Zv5\_scaffold1016.17  
193\_BRARE p Ensembl release\_38 pep.abinitio: GENSCAN00000029654 Zv5\_scaffold1233.1  
194\_BRARE Ensembl release\_38 pep.abinitio: GENSCAN00000031927 BX005142.4.2001-  
195\_BRARE p Ensembl release\_38 pep.abinitio: GENSCAN00000034621 BX323550.13.1-200031  
196\_BRARE p Ensembl release\_38 pep.abinitio: GENSCAN00000034633 Zv5\_scaffold1096.18  
197\_BRARE Ensembl release\_38 pep.abinitio: GENSCAN00000035392 BX469930.13.2001-  
198\_BRARE Ensembl release\_38 pep.abinitio: GENSCAN00000036728 AL929213.5.1-169897  
199\_BRARE Ensembl release\_38 pep.abinitio: GENSCAN00000037707 Zv5\_scaffold340.4  
200\_BRARE Ensembl release\_38 pep.abinitio: GENSCAN00000042057 Zv5\_scaffold819.2  
201\_NEMVE JGI Nematostella vectensis v1.0: e\_gw.224.21.1  
202\_NEMVE JGI Nematostella vectensis v1.0: e\_gw.360.15.1  
203\_NEMVE JGI Nematostella vectensis v1.0: e\_gw.384.21.1  
204\_NEMVE JGI Nematostella vectensis v1.0: e\_gw.57.87.1  
205\_NEMVE JGI Nematostella vectensis v1.0: e\_gw.98.208.1  
206\_NEMVE JGI Nematostella vectensis v1.0: estExt\_fgenes1\_pm.C\_660002  
207\_NEMVE JGI Nematostella vectensis v1.0: estExt\_fgenes1\_pm.C\_740006  
208\_NEMVE JGI Nematostella vectensis v1.0: estExt\_gwp.C\_4180040  
209\_NEMVE p JGI Nematostella vectensis v1.0: fgenes1\_pg.scaffold\_140000023 scaffold\_140  
210\_NEMVE JGI Nematostella vectensis v1.0: gw.158.70.1  
211\_STRPU\* HGSC Spur\_v2.0: Scaffold\_v2\_102470\_genscan\_1  
212\_STRPU HGSC Spur\_v2.0: Scaffold\_v2\_10454\_genscan\_2  
213\_STRPU HGSC Spur\_v2.0: Scaffold\_v2\_11300\_genscan\_7  
214\_STRPU HGSC Spur\_v2.0: Scaffold\_v2\_11320\_genscan\_2  
215\_STRPU HGSC Spur\_v2.0: Scaffold\_v2\_17921\_genscan\_1  
216\_STRPU HGSC Spur\_v2.0: Scaffold\_v2\_22981\_genscan\_2  
217\_STRPU HGSC Spur\_v2.0: Scaffold\_v2\_22981\_genscan\_4  
218\_STRPU HGSC Spur\_v2.0: Scaffold\_v2\_22981\_genscan\_10  
219\_STRPU HGSC Spur\_v2.0: Scaffold\_v2\_22981\_genscan\_12  
220\_STRPU\* HGSC Spur\_v2.0: Scaffold\_v2\_23814\_genscan\_1  
221\_STRPU HGSC Spur\_v2.0: Scaffold\_v2\_23814\_genscan\_2  
222\_STRPU HGSC Spur\_v2.0: Scaffold\_v2\_2419\_genscan\_1  
223\_STRPU HGSC Spur\_v2.0: Scaffold\_v2\_27169\_genscan\_1  
224\_STRPU HGSC Spur\_v2.0: Scaffold\_v2\_28078\_genscan\_24

|                    |                                              |
|--------------------|----------------------------------------------|
| 225_STRPU          | HGSC Spur_v2.0: Scaffold_v2_28078_genscan_27 |
| 226_STRPU          | HGSC Spur_v2.0: Scaffold_v2_28115_genscan_1  |
| 227_STRPU          | HGSC Spur_v2.0: Scaffold_v2_29819_genscan_1  |
| 228_STRPU*         | HGSC Spur_v2.0: Scaffold_v2_3438_genscan_6   |
| 229_STRPU          | HGSC Spur_v2.0: Scaffold_v2_35424_genscan_9  |
| 230_STRPU          | HGSC Spur_v2.0: Scaffold_v2_38293_genscan_1  |
| 231_STRPU          | HGSC Spur_v2.0: Scaffold_v2_4297_genscan_1   |
| 232_STRPU          | HGSC Spur_v2.0: Scaffold_v2_4297_genscan_3   |
| 233_STRPU          | HGSC Spur_v2.0: Scaffold_v2_43352_genscan_2  |
| 234_STRPU          | HGSC Spur_v2.0: Scaffold_v2_4343_genscan_3   |
| 235_STRPU          | HGSC Spur_v2.0: Scaffold_v2_4343_genscan_4   |
| 236_STRPU*         | HGSC Spur_v2.0: Scaffold_v2_4979_genscan_4   |
| 237_STRPU          | HGSC Spur_v2.0: Scaffold_v2_50167_genscan_2  |
| 238_STRPU          | HGSC Spur_v2.0: Scaffold_v2_50936_genscan_1  |
| 239_STRPU          | HGSC Spur_v2.0: Scaffold_v2_58909_genscan_1  |
| 240_STRPU          | HGSC Spur_v2.0: Scaffold_v2_59540_genscan_13 |
| 241_STRPU          | HGSC Spur_v2.0: Scaffold_v2_61322_genscan_2  |
| 242_STRPU          | HGSC Spur_v2.0: Scaffold_v2_6185_genscan_1   |
| 243_STRPU          | HGSC Spur_v2.0: Scaffold_v2_63743_genscan_1  |
| 244_STRPU <b>p</b> | HGSC Spur_v2.0: Scaffold_v2_65983_genscan_1  |
| 245_STRPU          | HGSC Spur_v2.0: Scaffold_v2_68537_genscan_1  |
| 246_STRPU*         | HGSC Spur_v2.0: Scaffold_v2_69977_genscan_1  |
| 247_STRPU          | HGSC Spur_v2.0: Scaffold_v2_70603_genscan_1  |
| 248_STRPU*         | HGSC Spur_v2.0: Scaffold_v2_83186_genscan_19 |
| 249_STRPU          | HGSC Spur_v2.0: Scaffold_v2_83903_genscan_16 |
| 250_STRPU          | HGSC Spur_v2.0: Scaffold_v2_86595_genscan_2  |
| 251_STRPU*         | HGSC Spur_v2.0: Scaffold_v2_86851_genscan_1  |
| 252_STRPU*         | HGSC Spur_v2.0: Scaffold_v2_96440_genscan_1  |

---

\*These 18 sequences are not shown in shown in Additional Figure 4 because they match the Peptidase\_C14 Is HMM (Pfam 21.0) with an E-value larger than 0.1 and/or because the match length is less than 100aa.

**p:** These (19) para-caspase sequences are not shown in shown in Additional Figure 4.
